# Supplementary material for: Choroidal Assessment in Patients with Type 2 Diabetes Mellitus and Non-Proliferative Diabetic Retinopathy by Swept-Source Ocular Coherence Tomography and Image Binarization
Source: MDPI journal article supplement (doi:10.3390/medicina58070918), 2022-07-10
Supplement: s1 [file s1]

**Table S1:** Linear regression analysis of factors associated with subfoveal choroidal thickness for group 1.

| Variables                    | Univariate       |                      |          | Multivariate <sup>1</sup> |                      |          |
|------------------------------|------------------|----------------------|----------|---------------------------|----------------------|----------|
|                              | Unstandardized B | Standardized $\beta$ | <i>p</i> | Unstandardized B          | Standardized $\beta$ | <i>p</i> |
| Age (years)                  | -7.529           | -0.645               | 0.002    | -3.131                    | -0.268               | 0.017    |
| Sex, female                  | 3.833            | 0.017                | 0.941    |                           |                      |          |
| BCVA (logMAR)                | -185.583         | -0.382               | 0.087    |                           |                      |          |
| SE (D)                       | -9.367           | -0.124               | 0.591    |                           |                      |          |
| IOP (mmHg)                   | 4.890            | 0.148                | 0.523    |                           |                      |          |
| Lens status, phakic          | 26.173           | 0.118                | 0.609    |                           |                      |          |
| Axial length (mm)            | -7.686           | -0.051               | 0.828    |                           |                      |          |
| Fasting blood sugar (mmol/l) | -8.887           | -0.042               | 0.855    |                           |                      |          |
| HbA1c (%)                    | -54.028          | -0.219               | 0.341    |                           |                      |          |
| HBP, present                 | 65.088           | 0.231                | 0.313    |                           |                      |          |
| SF-RT ( $\mu$ )              | 0.206            | 0.040                | 0.864    |                           |                      |          |
| LA-1.5 (mm <sup>2</sup> )    | 290.333          | 0.959                | 0.001    | 250.669                   | 0.828                | 0.306    |
| LA-3 (mm <sup>2</sup> )      | 150.630          | 0.952                | 0.001    | -295.360                  | -1.867               | 0.097    |
| LA-6 (mm <sup>2</sup> )      | 75.456           | 0.938                | 0.001    | 156.572                   | 1.946                | 0.050    |
| SA-1.5 (mm <sup>2</sup> )    | 631.879          | 0.964                | 0.001    | 784.878                   | 1.198                | 0.082    |
| SA-3 (mm <sup>2</sup> )      | 315.909          | 0.949                | 0.001    | 216.424                   | 0.650                | 0.345    |
| SA-6 (mm <sup>2</sup> )      | 156.582          | 0.940                | 0.001    | -322.776                  | -1.937               | 0.037    |
| LA/SA-1.5 (mm <sup>2</sup> ) | 120.725          | 0.239                | 0.297    |                           |                      |          |
| LA/SA-3 (mm <sup>2</sup> )   | 39.125           | 0.095                | 0.681    |                           |                      |          |
| LA/SA-6 (mm <sup>2</sup> )   | 255.971          | 0.387                | 0.083    |                           |                      |          |
| CVI-1.5 (mm <sup>2</sup> )   | 15.062           | 0.316                | 0.162    |                           |                      |          |
| CVI-3 (mm <sup>2</sup> )     | 7.989            | 0.199                | 0.388    |                           |                      |          |
| CVI-6 (mm <sup>2</sup> )     | 23.474           | 0.432                | 0.051    |                           |                      |          |

<sup>1</sup> adjusted for variables with a *p* < 0.05 in the univariate analysis.

**Table S2:** Linear regression analysis of factors associated with subfoveal choroidal thickness for group 2.

| Variables                    | Univariable      |                      |          | Multivariable <sup>1</sup> |                      |          |
|------------------------------|------------------|----------------------|----------|----------------------------|----------------------|----------|
|                              | Unstandardized B | Standardized $\beta$ | <i>p</i> | Unstandardized B           | Standardized $\beta$ | <i>p</i> |
| Age (years)                  | -1.041           | -0.11                | 0.644    |                            |                      |          |
| Sex, female                  | 11.50            | 0.068                | 0.777    |                            |                      |          |
| BCVA (logMAR)                | -193.73          | -0.34                | 0.142    |                            |                      |          |
| SE (D)                       | 37.04            | 0.514                | 0.020    | 3.861                      | 0.054                | 0.337    |
| IOP (mmHg)                   | 13.75            | 0.282                | 0.229    |                            |                      |          |
| Lens status, phakic          | -6.78            | -0.041               | 0.865    |                            |                      |          |
| Axial length (mm)            | -62.74           | -0.449               | 0.047    | -33.940                    | -0.243               | 0.001    |
| Fasting blood sugar (mmol/l) | -44.05           | -0.529               | 0.016    | -51.485                    | -0.618               | 0.001    |
| HbA1c (%)                    | -20.25           | -0.684               | 0.001    | 3.886                      | 0.131                | 0.040    |
| Diabetes duration (years)    | -0.423           | -0.013               | 0.955    |                            |                      |          |
| DM treatment, OADs           | -76.42           | -0.2                 | 0.398    |                            |                      |          |
| HBP, present                 | -72.86           | -0.312               | 0.180    |                            |                      |          |
| SF-RT ( $\mu$ )              | 3.158            | 0.613                | 0.004    | 3.174                      | 0.616                | 0.001    |
| LA-1.5 (mm <sup>2</sup> )    | 285.727          | 0.939                | 0.001    | 68.826                     | 0.226                | 0.312    |
| LA-3 (mm <sup>2</sup> )      | 138.304          | 0.917                | 0.001    | 3.519                      | 0.023                | 0.880    |
| LA-6 (mm <sup>2</sup> )      | 83.756           | 0.853                | 0.001    | -74.974                    | -0.764               | 0.361    |

|                              |         |        |       |          |        |       |
|------------------------------|---------|--------|-------|----------|--------|-------|
| SA-1.5 (mm <sup>2</sup> )    | 613.289 | 0.926  | 0.001 | 144.120  | 0.218  | 0.090 |
| SA-3 (mm <sup>2</sup> )      | -3.766  | -0.087 | 0.715 |          |        |       |
| SA-6 (mm <sup>2</sup> )      | 142.145 | 0.724  | 0.001 | 102.875  | 0.524  | 0.528 |
| LA/SA-1.5 (mm <sup>2</sup> ) | 139.899 | 0.301  | 0.198 |          |        |       |
| LA/SA-3 (mm <sup>2</sup> )   | 34.817  | 0.245  | 0.297 |          |        |       |
| LA/SA-6 (mm <sup>2</sup> )   | 307.963 | 0.546  | 0.013 | -116.156 | -0.206 | 0.603 |
| CVI-1.5 (mm <sup>2</sup> )   | 12.394  | 0.307  | 0.189 |          |        |       |
| CVI-3 (mm <sup>2</sup> )     | 6.042   | 0.186  | 0.433 |          |        |       |
| CVI-6 (mm <sup>2</sup> )     | 25.338  | 0.522  | 0.018 | 1824.955 | 0.376  | 0.396 |

<sup>1</sup> adjusted for variables with a  $p < 0.05$  in the univariate analysis.

**Table S3:** Linear regression analysis of factors associated with subfoveal choroidal thickness for group 3.

| Variables                    | Univariable      |                      |       | Multivariable <sup>1</sup> |                      |       |
|------------------------------|------------------|----------------------|-------|----------------------------|----------------------|-------|
|                              | Unstandardized B | Standardized $\beta$ | $p$   | Unstandardized B           | Standardized $\beta$ | $p$   |
| Age (years)                  | -0.626           | -0.043               | 0.850 |                            |                      |       |
| Sex, female                  | 19.504           | 0.115                | 0.610 |                            |                      |       |
| BCVA (logMAR)                | -193.738         | -0.340               | 0.142 |                            |                      |       |
| SE (D)                       | 8.212            | 0.148                | 0.510 |                            |                      |       |
| IOP (mmHg)                   | 6.013            | 0.158                | 0.484 |                            |                      |       |
| Lens status, phakic          | -35.600          | -0.123               | 0.586 |                            |                      |       |
| Axial length (mm)            | -6.698           | -0.057               | 0.800 |                            |                      |       |
| Fasting blood sugar (mmol/l) | -0.640           | -0.030               | 0.894 |                            |                      |       |
| HbA1c (%)                    | 6.788            | 0.142                | 0.528 |                            |                      |       |
| Diabetes duration (years)    | -1.799           | -0.145               | 0.521 |                            |                      |       |
| DM treatment, OADs           | -5.692           | -0.034               | 0.882 |                            |                      |       |
| HBP, present                 | -61.556          | -0.285               | 0.198 |                            |                      |       |
| SF-RT ( $\mu$ )              | 0.069            | 0.023                | 0.919 |                            |                      |       |
| LA-1.5 (mm <sup>2</sup> )    | 183.715          | 0.673                | 0.000 | -1572.942                  | -5.765               | 0.525 |
| LA-3 (mm <sup>2</sup> )      | 96.075           | 0.677                | 0.001 | 1854.476                   | 13.069               | 0.393 |
| LA-6 (mm <sup>2</sup> )      | 49.173           | 0.656                | 0.001 | -213.472                   | -2.850               | 0.777 |
| SA-1.5 (mm <sup>2</sup> )    | 386.876          | 0.652                | 0.001 | 2806.650                   | 4.732                | 0.524 |
| SA-3 (mm <sup>2</sup> )      | 223.001          | 0.665                | 0.001 | -2953.182                  | -8.811               | 0.452 |
| SA-6 (mm <sup>2</sup> )      | 97.209           | 0.611                | 0.002 | 265.000                    | 1.667                | 0.841 |
| LA/SA-1.5 (mm <sup>2</sup> ) | 161.236          | 0.432                | 0.044 | -1785.517                  | -4.789               | 0.528 |
| LA/SA-3 (mm <sup>2</sup> )   | 189.933          | 0.506                | 0.016 | -2807.192                  | -7.485               | 0.649 |
| LA/SA-6 (mm <sup>2</sup> )   | 199.137          | 0.469                | 0.028 | 2571.611                   | 6.061                | 0.361 |
| CVI-1.5 (mm <sup>2</sup> )   | 13.311           | 0.465                | 0.029 | 173.825                    | 6.078                | 0.380 |
| CVI-3 (mm <sup>2</sup> )     | 15.360           | 0.531                | 0.011 | 131.575                    | 4.550                | 0.713 |
| CVI-6 (mm <sup>2</sup> )     | 15.540           | 0.478                | 0.024 | -193.022                   | -5.942               | 0.239 |

<sup>1</sup> adjusted for variables with a  $p < 0.05$  in the univariate analysis.

**Table S4:** Linear regression analysis of factors associated with CVI-1.5 for group 1.

| Variables     | Univariable      |                      |       | Multivariable <sup>1</sup> |                      |     |
|---------------|------------------|----------------------|-------|----------------------------|----------------------|-----|
|               | Unstandardized B | Standardized $\beta$ | $p$   | Unstandardized B           | Standardized $\beta$ | $p$ |
| Age (years)   | -0.078           | -0.318               | 0.159 |                            |                      |     |
| Sex, female   | 0.291            | 0.062                | 0.789 |                            |                      |     |
| BCVA (logMAR) | 0.786            | 0.077                | 0.740 |                            |                      |     |
| SE (D)        | -0.119           | -0.075               | 0.745 |                            |                      |     |
| IOP (mmHg)    | -0.064           | -0.091               | 0.693 |                            |                      |     |

|                              |        |        |       |
|------------------------------|--------|--------|-------|
| Lens status, phakic          | 0.668  | 0.144  | 0.534 |
| Axial length (mm)            | 0.406  | 0.127  | 0.583 |
| Fasting blood sugar (mmol/l) | -0.223 | -0.051 | 0.827 |
| HbA1c (%)                    | -0.277 | -0.053 | 0.818 |
| HBP, present                 | 1.359  | 0.230  | 0.316 |
| SF-RT ( $\mu$ )              | 0.015  | 0.142  | 0.539 |
| SF-CT ( $\mu$ )              | 0.007  | 0.316  | 0.162 |
| SA-1.5 (mm <sup>2</sup> )    | 3.365  | 0.244  | 0.286 |
| SA-3 (mm <sup>2</sup> )      | 1.455  | 0.208  | 0.366 |
| SA-6 (mm <sup>2</sup> )      | 1.021  | 0.292  | 0.199 |

<sup>1</sup> adjusted for variables with a  $p < 0.05$  in the univariate analysis.

**Table S5:** Linear regression analysis of factors associated with CVI-1.5 for group 2.

| Variables                    | Univariable         |                         |       | Multivariable <sup>1</sup> |                         |       |
|------------------------------|---------------------|-------------------------|-------|----------------------------|-------------------------|-------|
|                              | Unstandardized<br>B | Standardized<br>$\beta$ | $p$   | Unstandardized<br>B        | Standardized<br>$\beta$ | $p$   |
| Age (years)                  | -0.017              | -0.073                  | 0.759 |                            |                         |       |
| Sex, female                  | -1.001              | -0.238                  | 0.312 |                            |                         |       |
| BCVA (logMAR)                | 8.800               | 0.625                   | 0.003 | 0.000                      | 0.000                   | 0.999 |
| SE (D)                       | -0.664              | -0.372                  | 0.106 |                            |                         |       |
| IOP (mmHg)                   | -0.545              | -0.451                  | 0.046 | -0.010                     | -0.008                  | 0.640 |
| Lens status, phakic          | -0.345              | -0.083                  | 0.727 |                            |                         |       |
| Axial length (mm)            | -0.600              | -0.174                  | 0.464 |                            |                         |       |
| Fasting blood sugar (mmol/l) | -0.867              | -0.421                  | 0.065 |                            |                         |       |
| HbA1c (%)                    | 0.035               | 0.048                   | 0.841 |                            |                         |       |
| Diabetes duration (years)    | -0.036              | -0.046                  | 0.848 |                            |                         |       |
| DM treatment, OADs           | -0.238              | -0.025                  | 0.916 |                            |                         |       |
| HBP, present                 | -2.045              | -0.355                  | 0.125 |                            |                         |       |
| SF-RT ( $\mu$ )              | -0.008              | -0.061                  | 0.799 |                            |                         |       |
| SF-CT ( $\mu$ )              | 0.008               | 0.307                   | 0.189 |                            |                         |       |
| SA-1.5 (mm <sup>2</sup> )    | 2.665               | 0.163                   | 0.493 |                            |                         |       |
| SA-3 (mm <sup>2</sup> )      | -0.389              | -0.363                  | 0.115 |                            |                         |       |
| SA-6 (mm <sup>2</sup> )      | 2.117               | 0.436                   | 0.055 |                            |                         |       |

<sup>1</sup> adjusted for variables with a  $p < 0.05$  in the univariate analysis.

**Table S6:** Linear regression analysis of factors associated with CVI-1.5 for group 3.

| Variables                    | Univariable      |                      |          | Multivariable <sup>1</sup> |                      |          |
|------------------------------|------------------|----------------------|----------|----------------------------|----------------------|----------|
|                              | Unstandardized B | Standardized $\beta$ | <i>p</i> | Unstandardized B           | Standardized $\beta$ | <i>p</i> |
| Age (years)                  | −0.026           | −0.052               | 0.820    |                            |                      |          |
| Sex, female                  | −0.023           | −0.004               | 0.986    |                            |                      |          |
| BCVA (logMAR)                | −2.556           | −0.189               | 0.398    |                            |                      |          |
| SE (D)                       | −0.492           | −0.254               | 0.254    |                            |                      |          |
| IOP (mmHg)                   | −0.394           | −0.295               | 0.182    |                            |                      |          |
| Lens status, phakic          | −3.611           | −0.357               | 0.103    |                            |                      |          |
| Axial length (mm)            | 0.464            | 0.113                | 0.615    |                            |                      |          |
| Fasting blood sugar (mmol/l) | −0.085           | −0.115               | 0.611    |                            |                      |          |
| HbA1c (%)                    | −0.003           | −0.002               | 0.994    |                            |                      |          |
| Diabetes duration (years)    | −0.092           | −0.211               | 0.346    |                            |                      |          |
| DM treatment, OADs           | 0.596            | 0.101                | 0.656    |                            |                      |          |
| HBP, present                 | −2.345           | −0.311               | 0.159    |                            |                      |          |
| SF-RT ( $\mu$ )              | 0.036            | 0.351                | 0.109    |                            |                      |          |
| SF-CT ( $\mu$ )              | 0.016            | 0.465                | 0.029    | 0.002                      | 0.052                | 0.074    |
| SA-1.5 (mm <sup>2</sup> )    | 8.829            | 0.426                | 0.048    | 1.656                      | 0.080                | 0.372    |
| SA-3 (mm <sup>2</sup> )      | 5.941            | 0.507                | 0.016    | −0.904                     | −0.077               | 0.376    |
| SA-6 (mm <sup>2</sup> )      | 2.276            | 0.409                | 0.058    |                            |                      |          |

<sup>1</sup> adjusted for variables with a  $p < 0.05$  in the univariate analysis.

**Table S7:** Linear regression analysis of factors associated with CVI-3 for group 1.

| Variables                    | Univariable      |                      |          | Multivariable <sup>1</sup> |                      |          |
|------------------------------|------------------|----------------------|----------|----------------------------|----------------------|----------|
|                              | Unstandardized B | Standardized $\beta$ | <i>p</i> | Unstandardized B           | Standardized $\beta$ | <i>p</i> |
| Age (years)                  | −0.105           | −0.361               | 0.118    |                            |                      |          |
| Sex, female                  | 0.753            | 0.136                | 0.557    |                            |                      |          |
| BCVA (logMAR)                | 1.288            | 0.107                | 0.645    |                            |                      |          |
| SE (D)                       | −0.164           | −0.088               | 0.706    |                            |                      |          |
| IOP (mmHg)                   | −0.128           | −0.155               | 0.502    |                            |                      |          |
| Lens status, phakic          | 1.340            | 0.244                | 0.287    |                            |                      |          |
| Axial length (mm)            | 0.168            | 0.044                | 0.848    |                            |                      |          |
| Fasting blood sugar (mmol/l) | −0.158           | −0.030               | 0.896    |                            |                      |          |
| HbA1c (%)                    | −0.262           | −0.043               | 0.854    |                            |                      |          |
| HBP, present                 | 1.703            | 0.243                | 0.288    |                            |                      |          |
| SF-RT ( $\mu$ )              | 0.005            | 0.039                | 0.866    |                            |                      |          |
| SF-CT ( $\mu$ )              | 0.005            | 0.199                | 0.388    |                            |                      |          |
| SA-1.5 (mm <sup>2</sup> )    | 0.1946           | 0.119                | 0.606    |                            |                      |          |
| SA-3 (mm <sup>2</sup> )      | 0.496            | 0.060                | 0.797    |                            |                      |          |
| SA-6 (mm <sup>2</sup> )      | 0.797            | 0.192                | 0.404    |                            |                      |          |

<sup>1</sup> adjusted for variables with a  $p < 0.05$  in the univariate analysis.

**Table S8:** Linear regression analysis of factors associated with CVI-3 for group 2.

| Variables                    | Univariable    |              |          | Multivariable <sup>1</sup> |              |          |
|------------------------------|----------------|--------------|----------|----------------------------|--------------|----------|
|                              | Unstandardized | Standardized | <i>p</i> | Unstandardized             | Standardized | <i>p</i> |
|                              | B              | $\beta$      |          | B                          | $\beta$      |          |
| Age (years)                  | -0.085         | -0.293       | 0.198    |                            |              |          |
| Sex, female                  | 0.265          | 0.512        | 0.832    |                            |              |          |
| BCVA (logMAR)                | 6.442          | 0.368        | 0.111    |                            |              |          |
| SE (D)                       | -0.163         | -0.074       | 0.758    |                            |              |          |
| IOP (mmHg)                   | -0.799         | -0.532       | 0.016    |                            |              |          |
| Lens status, phakic          | 0.772          | 0.150        | 0.528    |                            |              |          |
| Axial length (mm)            | -1.427         | -0.332       | 0.152    |                            |              |          |
| Fasting blood sugar (mmol/l) | -0.116         | -0.045       | 0.850    |                            |              |          |
| HbA1c (%)                    | 0.297          | 0.326        | 0.161    |                            |              |          |
| Diabetes duration (years)    | -0.036         | -0.046       | 0.848    |                            |              |          |
| DM treatment, OADs           | 0.148          | 0.150        | 0.528    |                            |              |          |
| HBP, present                 | -0.629         | -0.088       | 0.713    |                            |              |          |
| SF-RT ( $\mu$ )              | 0.009          | 0.056        | 0.815    |                            |              |          |
| SF-CT ( $\mu$ )              | 0.006          | 0.186        | 0.433    |                            |              |          |
| SA-1.5 (mm <sup>2</sup> )    | 0.200          | 0.010        | 0.967    |                            |              |          |
| SA-3 (mm <sup>2</sup> )      | -0.025         | -0.019       | 0.937    |                            |              |          |
| SA-6 (mm <sup>2</sup> )      | -0.439         | -0.073       | 0.761    |                            |              |          |

<sup>1</sup> adjusted for variables with a  $p < 0.05$  in the univariate analysis.**Table S9:** Linear regression analysis of factors associated with CVI-3 for group 3.

| Variables                    | Univariable    |              |          | Multivariable <sup>1</sup> |              |          |
|------------------------------|----------------|--------------|----------|----------------------------|--------------|----------|
|                              | Unstandardized | Standardized | <i>p</i> | Unstandardized             | Standardized | <i>p</i> |
|                              | B              | $\beta$      |          | B                          | $\beta$      |          |
| Age (years)                  | 0.012          | 0.023        | 0.919    |                            |              |          |
| Sex, female                  | 0.040          | 0.007        | 0.976    |                            |              |          |
| BCVA (logMAR)                | -1.541         | -0.116       | 0.609    |                            |              |          |
| SE (D)                       | -0.174         | -0.091       | 0.687    |                            |              |          |
| IOP (mmHg)                   | -0.340         | -0.258       | 0.247    |                            |              |          |
| Lens status, phakic          | -3.252         | -0.325       | 0.140    |                            |              |          |
| Axial length (mm)            | 0.749          | 0.185        | 0.410    |                            |              |          |
| Fasting blood sugar (mmol/l) | -0.051         | -0.070       | 0.756    |                            |              |          |
| HbA1c (%)                    | 0.051          | 0.031        | 0.891    |                            |              |          |
| Diabetes duration (years)    | -0.092         | -0.211       | 0.346    |                            |              |          |
| DM treatment, OADs           | -0.087         | -0.203       | 0.364    |                            |              |          |
| HBP, present                 | -2.002         | -0.268       | 0.227    |                            |              |          |
| SF-RT ( $\mu$ )              | 0.026          | 0.256        | 0.251    |                            |              |          |
| SF-CT ( $\mu$ )              | 0.018          | 0.531        | 0.011    | 0.001                      | 0.028        | 0.256    |
| SA-1.5 (mm <sup>2</sup> )    | 11.636         | 0.567        | 0.006    | 0.305                      | 0.015        | 0.848    |
| SA-3 (mm <sup>2</sup> )      | 7.010          | 0.605        | 0.003    | 0.235                      | 0.020        | 0.857    |
| SA-6 (mm <sup>2</sup> )      | 2.779          | 0.505        | 0.016    | -0.116                     | -0.021       | 0.780    |

<sup>1</sup> adjusted for variables with a  $p < 0.05$  in the univariate analysis.

**Table S10:** Linear regression analysis of factors associated with CVI-6 for group 1.

| Variables                    | Univariable         |                         |          | Multivariable <sup>1</sup> |                         |          |
|------------------------------|---------------------|-------------------------|----------|----------------------------|-------------------------|----------|
|                              | Unstandardized<br>B | Standardized<br>$\beta$ | <i>p</i> | Unstandardized<br>B        | Standardized<br>$\beta$ | <i>p</i> |
| Age (years)                  | −0.062              | −0.287                  | 0.207    |                            |                         |          |
| Sex, female                  | −0.022              | −0.005                  | 0.982    |                            |                         |          |
| BCVA (logMAR)                | −0.421              | −0.047                  | 0.839    |                            |                         |          |
| SE (D)                       | −0.153              | −0.110                  | 0.634    |                            |                         |          |
| IOP (mmHg)                   | −0.059              | −0.097                  | 0.675    |                            |                         |          |
| Lens status, phakic          | 0.867               | 0.213                   | 0.354    |                            |                         |          |
| Axial length (mm)            | 0.534               | 0.191                   | 0.407    |                            |                         |          |
| Fasting blood sugar (mmol/l) | −0.392              | −0.102                  | 0.660    |                            |                         |          |
| HbA1c (%)                    | −0.234              | −0.052                  | 0.824    |                            |                         |          |
| HBP, present                 | 1.121               | 0.217                   | 0.345    |                            |                         |          |
| SF-RT ( $\mu$ )              | 0.002               | 0.024                   | 0.971    |                            |                         |          |
| SF-CT ( $\mu$ )              | 0.008               | 0.432                   | 0.051    |                            |                         |          |
| SA-1.5 (mm <sup>2</sup> )    | 4.243               | 0.352                   | 0.118    |                            |                         |          |
| SA-3 (mm <sup>2</sup> )      | 1.899               | 0.310                   | 0.171    |                            |                         |          |
| SA-6 (mm <sup>2</sup> )      | 1.168               | 0.381                   | 0.088    |                            |                         |          |

<sup>1</sup> adjusted for variables with a *p* < 0.05 in the univariate analysis.**Table S11:** Linear regression analysis of factors associated with CVI-6 for group 2.

| Variables                    | Univariable         |                         |          | Multivariable <sup>1</sup> |                         |          |
|------------------------------|---------------------|-------------------------|----------|----------------------------|-------------------------|----------|
|                              | Unstandardized<br>B | Standardized<br>$\beta$ | <i>p</i> | Unstandardized<br>B        | Standardized<br>$\beta$ | <i>p</i> |
| Age (years)                  | −0.079              | −0.408                  | 0.074    |                            |                         |          |
| Sex, female                  | 0.314               | 0.090                   | 0.707    |                            |                         |          |
| BCVA (logMAR)                | −1.118              | −0.095                  | 0.689    |                            |                         |          |
| SE (D)                       | 0.658               | 0.443                   | 0.050    |                            |                         |          |
| IOP (mmHg)                   | −0.086              | −0.086                  | 0.720    |                            |                         |          |
| Lens status, phakic          | 1.065               | 0.309                   | 0.185    |                            |                         |          |
| Axial length (mm)            | −0.861              | −0.299                  | 0.200    |                            |                         |          |
| Fasting blood sugar (mmol/l) | −0.359              | −0.209                  | 0.377    |                            |                         |          |
| HbA1c (%)                    | −0.118              | −0.193                  | 0.415    |                            |                         |          |
| Diabetes duration (years)    | −0.043              | −0.065                  | 0.784    |                            |                         |          |
| DM treatment, OADs           | −0.298              | −0.038                  | 0.874    |                            |                         |          |
| HBP, present                 | 0.451               | 0.094                   | 0.694    |                            |                         |          |
| SF-RT ( $\mu$ )              | 0.040               | 0.377                   | 0.102    |                            |                         |          |
| SF-CT ( $\mu$ )              | 0.011               | 0.522                   | 0.018    |                            |                         |          |
| SA-1.5 (mm <sup>2</sup> )    | 5.005               | 0.367                   | 0.112    |                            |                         |          |
| SA-3 (mm <sup>2</sup> )      | −0.003              | −0.003                  | 0.991    |                            |                         |          |
| SA-6 (mm <sup>2</sup> )      | 0.046               | 0.011                   | 0.962    |                            |                         |          |

<sup>1</sup> adjusted for variables with a *p* < 0.05 in the univariate analysis.

**Table S12:** Linear regression analysis of factors associated with CVI-6 for group 3.

| Variables                    | Univariable    |              |          | Multivariable <sup>1</sup> |              |          |
|------------------------------|----------------|--------------|----------|----------------------------|--------------|----------|
|                              | Unstandardized | Standardized | <i>p</i> | Unstandardized             | Standardized | <i>p</i> |
|                              | B              | $\beta$      |          | B                          | $\beta$      |          |
| Age (years)                  | 0.013          | 0.028        | 0.900    |                            |              |          |
| Sex, female                  | −0.518         | −0.099       | 0.660    |                            |              |          |
| BCVA (logMAR)                | −0.501         | −0.042       | 0.852    |                            |              |          |
| SE (D)                       | −0.024         | −0.014       | 0.951    |                            |              |          |
| IOP (mmHg)                   | −0.231         | −0.196       | 0.381    |                            |              |          |
| Lens status, phakic          | −2.752         | −0.309       | 0.162    |                            |              |          |
| Axial length (mm)            | 0.875          | 0.243        | 0.276    |                            |              |          |
| Fasting blood sugar (mmol/l) | −0.001         | −0.002       | 0.994    |                            |              |          |
| HbA1c (%)                    | 0.051          | 0.034        | 0.879    |                            |              |          |
| Diabetes duration (years)    | −0.085         | −0.221       | 0.323    |                            |              |          |
| DM treatment, OADs           | 0.715          | 0.137        | 0.542    |                            |              |          |
| HBP, present                 | −1.873         | −0.282       | 0.204    |                            |              |          |
| SF-RT ( $\mu$ )              | 0.015          | 0.167        | 0.458    |                            |              |          |
| SF-CT ( $\mu$ )              | 0.015          | 0.478        | 0.024    | 0.00002629                 | 0.001        | 0.970    |
| SA-1.5 (mm <sup>2</sup> )    | 9.547          | 0.523        | 0.013    | 0.626                      | 0.034        | 0.643    |
| SA-3 (mm <sup>2</sup> )      | 5.748          | 0.557        | 0.007    | 0.556                      | 0.054        | 0.615    |
| SA-6 (mm <sup>2</sup> )      | 2.073          | 0.424        | 0.049    | −0.295                     | −0.060       | 0.406    |

<sup>1</sup> adjusted for variables with a *p* < 0.05 in the univariate analysis.
